# Supplementary material for: BIN1 knockdown rescues systolic dysfunction in aging male mouse hearts
Source: PubMed Central journal article supplement (PMC11045846; doi:10.1038/s41467-024-47847-8), 2024-04-25
Supplement: 41467_2024_47847_MOESM3_ESM.pdf [file 41467_2024_47847_MOESM3_ESM.pdf]

## Description of Additional Supplementary Files

**Supplementary Movie 1:** ISO-stimulated  $\text{Ca}^{2+}$  dynamics are reduced in old myocytes compared to young. Videos showing TIRF time series recorded from representative young (JAX; left) and old (right) AAV9- $\text{Ca}^{2+}$  $\beta$ 2a-paGFP transduced ventricular myocytes before and during  $\beta$ -AR activation with 100 nM ISO. Videos were sped up to ~12x (from the recorded 10.34 fps to 124 fps) for display purposes.
